# Supplementary material
Source: publisher figshare collection journal article supplement (https://acs.figshare.com/ndownloader/files/4009189)

## Supporting Information

# A “Strongly” Self-Catenated Metal-Organic Framework With the Highest Topological Density among (3,4)-Coordinated Nets

Huiqing Ma,<sup>a</sup> Di Sun,<sup>a</sup> LiangLiang Zhang,<sup>c</sup> Rongming Wang,<sup>c</sup> Vladislav A. Blatov,<sup>\*,b,d</sup> Jie Guo,<sup>a</sup> Daofeng Sun<sup>\*,a,c</sup>

<sup>a</sup> Key Lab for Colloid and Interface Chemistry of Education Ministry, School of Chemistry and Chemical Engineering, Shandong University, Jinan, People’s Republic of China. E-mail: [dfsun@sdu.edu.cn](mailto:dfsun@sdu.edu.cn) (D.F.S)

<sup>b</sup> Department of Chemistry, Samara State University, Ac. Pavlov St. 1, Samara, Russia. E-mail: [blatov@samsu.ru](mailto:blatov@samsu.ru) (V.A.B)

<sup>c</sup> Chemistry Department, Faculty of Science, King Abdulaziz University, Jeddah 21589, Saudi Arabia.

<sup>d</sup> College of Science, China University of Petroleum (East China), Qingdao Shandong, People’s Republic of China. E-mail: [dfsun@upc.edu.cn](mailto:dfsun@upc.edu.cn) (D.F.S)

|                                                                                     |    |
|-------------------------------------------------------------------------------------|----|
| Materials and Methods .....                                                         | 2  |
| Synthesis of ligand H <sub>3</sub> L, compounds SDU-9 .....                         | 3  |
| Preparation of 4-Methoxycarbonylphenylboronic.....                                  | 3  |
| Preparation of hydroxytris(4-bromophenyl)silane: .....                              | 3  |
| Preparation of 4,4',4''-(hydroxysilanetriyl)tris(triphenyl-4-carboxylic acid):..... | 4  |
| Compound SDU-9 .....                                                                | 5  |
| X-ray Crystallography .....                                                         | 6  |
| Table S1. The table of self-catenation produced in the output of TOPOS .....        | 7  |
| Table S2. Crystallographic Data for SDU-9.....                                      | 11 |
| Table S3. Bond Distances (Å) and Angles (°) for SDU-9. ....                         | 12 |
| Table S4. Bond Distances (Å) and Angles (°) for SDU-9. ....                         | 13 |
| Fig. S1: PXRD spectrum of SDU-9.....                                                | 14 |
| Fig. S2: IR spectrum of SDU-9 .....                                                 | 15 |
| Fig. S3: TGA curve of SDU-9 .....                                                   | 16 |
| Fig. S4: Conformations of four non-equivalent 12-rings in SDU-9. ....               | 17 |

## Materials and Methods

All of the reagents and solvents employed were commercially available and used as received without further purification.  $^1\text{H}$  NMR spectra were recorded on a Bruker AVANCE-400 NMR Spectrometer. Elemental analysis was carried out on a CE instruments EA 1110 elemental analyzer. The FT-IR spectra were recorded from KBr pellets in the range  $4000\text{-}400\text{ cm}^{-1}$  with a Nicolet AVATAR FT-IR360 spectrometer. X-ray powder diffractions were measured on a Bruker AXS D8 Advance with  $\text{Cu } K_{\alpha}$  ( $\lambda = 1.5418\text{ \AA}$ , 40.0 kV, 30.0 mA) radiation. Photoluminescence spectra were measured on a Hitachi F-4500 Fluorescence Spectrophotometer (slit width: 5 nm; sensitivity: high). Thermogravimetric analysis (TGA) was carried out in a static  $\text{N}_2$  with a heating rate of  $10\text{ }^{\circ}\text{C}/\text{min}$ .

## Synthesis of ligand H<sub>3</sub>L, compounds SDU-9

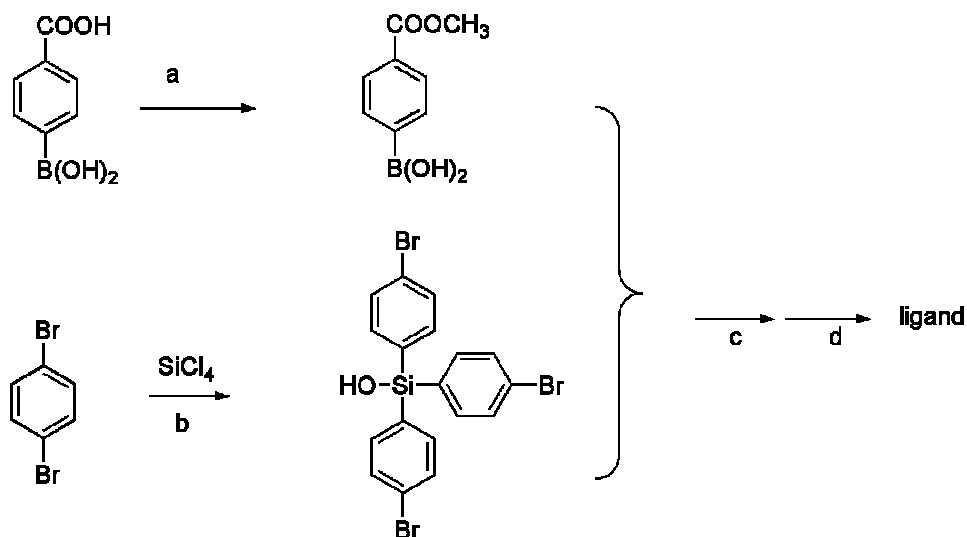

### Preparation of 4-Methoxycarbonylphenylboronic

4.6 g 4-Boronobenzoic acid was dissolved in 100 mL anhydrous MeOH. 12.5 mL SOCl<sub>2</sub> was added very slowly through the flask wall under magnetic stirring. The solution was disturbed at 45-50 °C for 2 hours and then concentrated on rotary evaporator. 50 mL brine was added. The mixture was extracted with ether acetate (50 \* 3). The organic phase was dried over anhydrous magnesium sulfate and dried on rotary evaporator to give white powder (4 g). <sup>1</sup>H NMR (CDCl<sub>3</sub>): 3.95, 3H; 8.14, 2H; 8.27, 2H.

### Preparation of hydroxytris(4-bromophenyl)silane:

A solution of n-BuLi (20 mL, 50 mmol, 2.5M in hexanes) in 100 mL Et<sub>2</sub>O was added to a solution of 1,4-dibromobenzene (11.8 g, 50 mmol) in 100 mL Et<sub>2</sub>O at -78 °C and stirred for 3 hours under N<sub>2</sub>. Perchlorosilane (2.84 g, 16.7 mmol) was then added dropwise and the reaction mixture was heated at reflux for 2 h. After being quenched with 50 mL H<sub>2</sub>O, the organic layer was separated, washed with brine, and dried over anhydrous MgSO<sub>4</sub>. Removal of the solvents under a vacuum yielded a yellow oil, which was recrystallized from hot CHCl<sub>3</sub>:EtOH (v:v = 1:3) to obtain white solids HOSi(4-C<sub>6</sub>H<sub>4</sub>Br)<sub>3</sub> (4.1 g). <sup>1</sup>H NMR (CDCl<sub>3</sub>) δ/ppm: 7.34 (t, 4H), 7.49 (dd, 4H).

**Preparation of 4,4',4''-(hydroxysilanetriyl)tris(triphenyl-4-carboxylic acid):**

4-Methoxycarbonylphenylboronic (3.2 g, 18 mmol), hydroxytris(4-bromophenyl)silane (2 g, 4.13 mmol), and CsF (6 g, 39.5 mmol) were mixed in DME (50 mL), and the mixture was deaerated using N<sub>2</sub> for 10 min. Pd(PPh<sub>3</sub>)<sub>4</sub> (0.3 g, 0.26 mmol) was added to the stirred reaction mixture and the mixture was heated at 90 °C for 48 h under N<sub>2</sub>, after which DME was removed under a vacuum. The resultant solid was washed with water (30 mL) and methylene dichloride (60 mL), respectively, and then dried under a vacuum. The pale solid was filtered and dried after refluxing in MeOH for 24 h. Yield: 59%. <sup>1</sup>H-NMR (300 MHz, CDCl<sub>3</sub>): δ/ppm = 0.98 (s, 1H), 3.943 (s, 3H), 7.6 (h, 6H), 8.0 (d, 2H), 8.7 (t, 1H). The ester (1.1 g, 1.7 mmol) was then suspended in a mixture of THF (20 mL) and MeOH (20 mL), to which 5 mL of 2 M NaOH aqueous solution was added. The mixture was stirred under reflux overnight and THF and MeOH were removed under a vacuum. Dilute HCl was added to the remaining aqueous solution until the solution was at pH = 2. The solid was collected by filtration, washed with water and MeOH, and dried to give H<sub>3</sub>L (0.95 g, 95.9% yield). <sup>1</sup>H-NMR (300 MHz, DMSO): δ/ppm: 7.7 (d, 2H), 7.8 (t, 1H), 7.8 (t, 2H), 8.0 (t, 1H), 13.4 (s, 1H).

## Compound SDU-9

The H<sub>3</sub>L (2.5 mg, 0.005 mmol), Cu(NO<sub>3</sub>)<sub>2</sub>·6H<sub>2</sub>O (5 mg, 0.018 mmol) were dissolved in DMF/EtOH/H<sub>2</sub>O (1/1/1, v/v/v, 1 mL). Then it was heated in a sealed tube, slowly heated to 75 °C from room temperature in 500 min, kept at 75 °C for 2000 min, and then slowly cooled to 30 °C in 600 min. The green crystalline block that formed was collected, washed with DMF, and dried in the air. Yield: *Ca.* 40 % based on Cu. Elemental analysis: Anal. Calc. for C<sub>78</sub>H<sub>80</sub>Cu<sub>3</sub>Si<sub>2</sub>O<sub>29</sub>: C 54.21, H 4.67 %. Found: C 54.39, H 4.31 %.

## X-ray Crystallography

Single-crystal X-ray diffraction was performed using a Bruker Apex II CCD diffractometer equipped with a fine-focus sealed-tube X-ray source (MoK $\alpha$  radiation, graphite monochromated). All absorption corrections were performed with the SADABS program [S1]. All the structures were solved by direct methods using SHELXS-97 [S2] and refined by full-matrix least-squares techniques using SHELXL-97 [S3]. Non-hydrogen atoms were refined with anisotropic displacement parameters during the final cycles. Hydrogen atoms were placed in calculated positions with isotropic displacement parameters set to  $1.2 \times U_{\text{eq}}$  of the attached atom. The crystallographic details of the crystal are summarized in Table **S1**, **S2** and **S3**. The treatment for the guest molecules in the **SDU-9** involves the use of the SQUEEZE program of PLATON [S4].

## References

- [S1] R.H. Blessing, *Acta. Crystallogr.* 1995, A51, 33.
- [S2] G.M. Sheldrick, *SHELXS 97: Program for Crystal Structure Solution*, University of Göttingen: Göttingen, Germany, 1997.
- [S3] G.M. Sheldrick, *SHELXL 97: Program for Crystal Structure refinement*, University of Göttingen: Göttingen, Germany, 1997.
- [S4] Spek, A. *J. Appl. Crystallogr.* 2003, 36, 7-13.

**Table S1. The table of self-catenation produced in the output of TOPOS**

Ring links

---

| Cycle 1 | Cycle 2 | Chain | Cross | Link | Hopf | Loop | Mult |
|---------|---------|-------|-------|------|------|------|------|
| 12a     | 12a     | 5     | 1     | 1    | *    |      | 4    |
| 12a     | 12a     | 4     | 1     | 1    | *    |      | 19   |
| 12a     | 12a     | 4     | 2     | 0    |      |      | 5    |
| 12a     | 12a     | 4     | 3     | 1    | *    |      | 1    |
| 12a     | 12a     | 3     | 1     | 1    | *    |      | 27   |
| 12a     | 12a     | 3     | 2     | 0    |      |      | 8    |
| 12a     | 12a     | 3     | 2     | 2    | M    |      | 2    |
| 12a     | 12a     | 3     | 3     | 1    | *    |      | 3    |
| 12a     | 12a     | 2     | 1     | 1    | *    |      | 21   |
| 12a     | 12a     | 2     | 2     | 0    |      |      | 6    |
| 12a     | 12a     | 2     | 3     | 1    | *    |      | 1    |
| 12a     | 12a     | 2     | 4     | 0    |      |      | 3    |
| 12a     | 12a     | 1     | 1     | 1    | *    |      | 16   |
| 12a     | 12a     | 1     | 2     | 0    |      |      | 2    |
| 12a     | 12a     | 1     | 3     | 1    | *    |      | 2    |
| 12a     | 12b     | 4     | 1     | 1    | *    |      | 8    |
| 12a     | 12b     | 4     | 2     | 0    |      |      | 1    |
| 12a     | 12b     | 3     | 1     | 1    | *    |      | 14   |
| 12a     | 12b     | 3     | 2     | 0    |      |      | 2    |
| 12a     | 12b     | 3     | 3     | 1    | *    |      | 1    |
| 12a     | 12b     | 3     | 4     | 0    |      |      | 1    |
| 12a     | 12b     | 2     | 1     | 1    | *    |      | 6    |
| 12a     | 12b     | 2     | 2     | 0    |      |      | 5    |
| 12a     | 12b     | 2     | 4     | 0    |      |      | 1    |
| 12a     | 12b     | 1     | 1     | 1    | *    |      | 3    |
| 12a     | 12b     | 1     | 2     | 0    |      |      | 5    |
| 12a     | 12b     | 1     | 3     | 1    | *    |      | 3    |
| 12a     | 12c     | 4     | 1     | 1    | *    |      | 4    |
| 12a     | 12c     | 4     | 2     | 0    |      |      | 3    |
| 12a     | 12c     | 3     | 1     | 1    | *    |      | 10   |
| 12a     | 12c     | 3     | 2     | 2    | M    |      | 1    |
| 12a     | 12c     | 3     | 2     | 0    |      |      | 2    |
| 12a     | 12c     | 3     | 3     | 1    | *    |      | 2    |
| 12a     | 12c     | 2     | 1     | 1    | *    |      | 14   |
| 12a     | 12c     | 2     | 2     | 0    |      |      | 4    |
| 12a     | 12c     | 2     | 3     | 1    | *    |      | 1    |
| 12a     | 12c     | 2     | 4     | 0    |      |      | 1    |
| 12a     | 12c     | 1     | 1     | 1    | *    |      | 5    |
| 12a     | 12c     | 1     | 2     | 0    |      |      | 3    |
| 12a     | 12c     | 1     | 3     | 1    | *    |      | 1    |
| 12a     | 12c     | 1     | 4     | 0    |      |      | 1    |
| 12a     | 12d     | 4     | 1     | 1    | *    |      | 12   |
| 12a     | 12d     | 4     | 2     | 0    |      |      | 2    |
| 12a     | 12d     | 4     | 3     | 1    | *    |      | 1    |
| 12a     | 12d     | 3     | 1     | 1    | *    |      | 11   |
| 12a     | 12d     | 3     | 2     | 0    |      |      | 4    |

|     |     |   |   |   |   |  |    |
|-----|-----|---|---|---|---|--|----|
| 12a | 12d | 3 | 3 | 1 | * |  | 2  |
| 12a | 12d | 2 | 1 | 1 | * |  | 10 |
| 12a | 12d | 2 | 2 | 0 |   |  | 5  |
| 12a | 12d | 2 | 3 | 1 | * |  | 2  |
| 12a | 12d | 1 | 1 | 1 | * |  | 6  |
| 12a | 12d | 1 | 2 | 0 |   |  | 2  |
| 12a | 12d | 1 | 4 | 0 |   |  | 1  |
| 12b | 12a | 4 | 1 | 1 | * |  | 12 |
| 12b | 12a | 4 | 3 | 1 | * |  | 2  |
| 12b | 12a | 4 | 5 | 1 | * |  | 2  |
| 12b | 12a | 4 | 6 | 0 |   |  | 8  |
| 12b | 12a | 3 | 1 | 1 | * |  | 24 |
| 12b | 12a | 3 | 2 | 0 |   |  | 4  |
| 12b | 12a | 3 | 4 | 0 |   |  | 2  |
| 12b | 12a | 3 | 5 | 1 | * |  | 6  |
| 12b | 12a | 3 | 6 | 0 |   |  | 2  |
| 12b | 12a | 2 | 1 | 1 | * |  | 12 |
| 12b | 12a | 2 | 2 | 0 |   |  | 8  |
| 12b | 12a | 2 | 4 | 0 |   |  | 2  |
| 12b | 12a | 2 | 6 | 0 |   |  | 2  |
| 12b | 12a | 1 | 1 | 1 | * |  | 10 |
| 12b | 12a | 1 | 2 | 0 |   |  | 6  |
| 12b | 12a | 1 | 3 | 1 | * |  | 2  |
| 12b | 12b | 5 | 1 | 1 | * |  | 2  |
| 12b | 12b | 5 | 2 | 2 | M |  | 1  |
| 12b | 12b | 4 | 2 | 2 | M |  | 1  |
| 12b | 12b | 3 | 1 | 1 | * |  | 14 |
| 12b | 12b | 3 | 3 | 1 | * |  | 2  |
| 12b | 12b | 3 | 5 | 1 | * |  | 4  |
| 12b | 12b | 3 | 6 | 0 |   |  | 2  |
| 12b | 12b | 2 | 1 | 1 | * |  | 10 |
| 12b | 12b | 2 | 2 | 0 |   |  | 2  |
| 12b | 12b | 2 | 6 | 0 |   |  | 2  |
| 12b | 12b | 1 | 2 | 0 |   |  | 2  |
| 12b | 12b | 1 | 6 | 0 |   |  | 2  |
| 12b | 12c | 4 | 1 | 1 | * |  | 4  |
| 12b | 12c | 4 | 6 | 0 |   |  | 2  |
| 12b | 12c | 3 | 1 | 1 | * |  | 6  |
| 12b | 12c | 3 | 5 | 1 | * |  | 2  |
| 12b | 12c | 3 | 6 | 0 |   |  | 2  |
| 12b | 12c | 3 | 7 | 1 | * |  | 2  |
| 12b | 12c | 2 | 1 | 1 | * |  | 10 |
| 12b | 12c | 2 | 2 | 0 |   |  | 6  |
| 12b | 12c | 1 | 1 | 1 | * |  | 4  |
| 12b | 12c | 1 | 2 | 0 |   |  | 2  |
| 12b | 12c | 1 | 6 | 0 |   |  | 2  |
| 12b | 12d | 5 | 1 | 1 | * |  | 2  |
| 12b | 12d | 4 | 1 | 1 | * |  | 8  |
| 12b | 12d | 4 | 5 | 1 | * |  | 2  |
| 12b | 12d | 3 | 1 | 1 | * |  | 10 |
| 12b | 12d | 3 | 2 | 0 |   |  | 2  |
| 12b | 12d | 3 | 3 | 1 | * |  | 2  |
| 12b | 12d | 3 | 4 | 0 |   |  | 2  |
| 12b | 12d | 3 | 5 | 1 | * |  | 2  |



|     |     |   |   |   |   |    |
|-----|-----|---|---|---|---|----|
| 12b | 12d | 3 | 7 | 1 | * | 2  |
| 12b | 12d | 2 | 1 | 1 | * | 8  |
| 12b | 12d | 2 | 2 | 0 |   | 2  |
| 12b | 12d | 2 | 5 | 1 | * | 2  |
| 12b | 12d | 2 | 6 | 0 |   | 2  |
| 12b | 12d | 1 | 1 | 1 | * | 6  |
| 12b | 12d | 1 | 2 | 0 |   | 2  |
| 12c | 12a | 4 | 1 | 1 | * | 8  |
| 12c | 12a | 3 | 1 | 1 | * | 24 |
| 12c | 12a | 3 | 2 | 2 | M | 2  |
| 12c | 12a | 2 | 1 | 1 | * | 30 |
| 12c | 12a | 2 | 2 | 0 |   | 4  |
| 12c | 12a | 1 | 1 | 1 | * | 12 |
| 12c | 12a | 1 | 2 | 0 |   | 2  |
| 12c | 12b | 4 | 1 | 1 | * | 4  |
| 12c | 12b | 3 | 1 | 1 | * | 10 |
| 12c | 12b | 2 | 1 | 1 | * | 10 |
| 12c | 12b | 2 | 2 | 0 |   | 6  |
| 12c | 12b | 1 | 1 | 1 | * | 4  |
| 12c | 12c | 5 | 1 | 1 | * | 2  |
| 12c | 12c | 5 | 2 | 2 | M | 1  |
| 12c | 12c | 3 | 1 | 1 | * | 10 |
| 12c | 12c | 3 | 2 | 0 |   | 2  |
| 12c | 12c | 2 | 1 | 1 | * | 18 |
| 12c | 12c | 1 | 1 | 1 | * | 4  |
| 12c | 12d | 5 | 1 | 1 | * | 2  |
| 12c | 12d | 4 | 1 | 1 | * | 4  |
| 12c | 12d | 3 | 1 | 1 | * | 14 |
| 12c | 12d | 2 | 1 | 1 | * | 18 |
| 12c | 12d | 1 | 1 | 1 | * | 2  |
| 12c | 12d | 1 | 2 | 0 |   | 2  |
| 12d | 12a | 4 | 1 | 1 | * | 24 |
| 12d | 12a | 4 | 2 | 0 |   | 6  |
| 12d | 12a | 4 | 3 | 1 | * | 2  |
| 12d | 12a | 4 | 4 | 0 |   | 2  |
| 12d | 12a | 3 | 1 | 1 | * | 24 |
| 12d | 12a | 3 | 2 | 0 |   | 6  |
| 12d | 12a | 3 | 3 | 1 | * | 2  |
| 12d | 12a | 2 | 1 | 1 | * | 22 |
| 12d | 12a | 2 | 2 | 0 |   | 8  |
| 12d | 12a | 2 | 3 | 1 | * | 2  |
| 12d | 12a | 1 | 1 | 1 | * | 12 |
| 12d | 12a | 1 | 2 | 0 |   | 12 |
| 12d | 12b | 5 | 1 | 1 | * | 2  |
| 12d | 12b | 4 | 1 | 1 | * | 8  |
| 12d | 12b | 4 | 3 | 1 | * | 2  |
| 12d | 12b | 3 | 1 | 1 | * | 12 |
| 12d | 12b | 3 | 2 | 0 |   | 6  |
| 12d | 12b | 3 | 3 | 1 | * | 4  |
| 12d | 12b | 2 | 1 | 1 | * | 10 |
| 12d | 12b | 2 | 2 | 0 |   | 2  |
| 12d | 12b | 1 | 1 | 1 | * | 2  |
| 12d | 12b | 1 | 2 | 0 |   | 2  |
| 12d | 12b | 1 | 3 | 1 | * | 4  |

|     |     |   |   |   |   |  |    |
|-----|-----|---|---|---|---|--|----|
| 12d | 12c | 5 | 1 | 1 | * |  | 2  |
| 12d | 12c | 4 | 1 | 1 | * |  | 2  |
| 12d | 12c | 4 | 3 | 1 | * |  | 2  |
| 12d | 12c | 3 | 1 | 1 | * |  | 10 |
| 12d | 12c | 3 | 2 | 0 |   |  | 4  |
| 12d | 12c | 3 | 3 | 1 | * |  | 4  |
| 12d | 12c | 2 | 1 | 1 | * |  | 18 |
| 12d | 12c | 2 | 2 | 0 |   |  | 2  |
| 12d | 12c | 1 | 1 | 1 | * |  | 2  |
| 12d | 12c | 1 | 2 | 0 |   |  | 8  |
| 12d | 12d | 5 | 1 | 1 | * |  | 6  |
| 12d | 12d | 4 | 1 | 1 | * |  | 6  |
| 12d | 12d | 4 | 2 | 0 |   |  | 4  |
| 12d | 12d | 4 | 4 | 0 |   |  | 1  |
| 12d | 12d | 3 | 1 | 1 | * |  | 16 |
| 12d | 12d | 3 | 2 | 0 |   |  | 2  |
| 12d | 12d | 3 | 3 | 1 | * |  | 2  |
| 12d | 12d | 2 | 1 | 1 | * |  | 10 |
| 12d | 12d | 2 | 2 | 0 |   |  | 4  |
| 12d | 12d | 2 | 3 | 1 | * |  | 2  |
| 12d | 12d | 1 | 1 | 1 | * |  | 4  |
| 12d | 12d | 1 | 2 | 0 |   |  | 4  |

---

**Table S2. Crystallographic Data for SDU-9**

| Complexes                                             | SDU-9                                                                           |
|-------------------------------------------------------|---------------------------------------------------------------------------------|
| Formula                                               | C <sub>78</sub> Cu <sub>3</sub> O <sub>17</sub> Si <sub>2</sub> H <sub>50</sub> |
| $M_r$                                                 | 1505.98                                                                         |
| Crystal system                                        | cubic                                                                           |
| Space group                                           | F432                                                                            |
| a (Å)                                                 | 33.4952 (7)                                                                     |
| b (Å)                                                 | 33.4952 (7)                                                                     |
| c (Å)                                                 | 33.4952 (7)                                                                     |
| $\alpha$ (deg)                                        | 90                                                                              |
| $\beta$ (deg)                                         | 90                                                                              |
| $\gamma$ (deg)                                        | 90                                                                              |
| Z                                                     | 16                                                                              |
| $V$ (Å <sup>3</sup> )                                 | 37579.2 (14)                                                                    |
| $D_c$ (g cm <sup>-3</sup> )                           | 1.065                                                                           |
| $\mu$ (mm <sup>-1</sup> )                             | 1.47                                                                            |
| F(000)                                                | 12304.0                                                                         |
| no. of unique reflns                                  | 2546                                                                            |
| no. of obsd reflns[I > 2 $\sigma$ (I)]                | 5827                                                                            |
| Parameters                                            | 143                                                                             |
| GOF                                                   | 0.914                                                                           |
| Final $R$ indices [I > 2 $\sigma$ (I)] <sup>a,b</sup> | $R_1 = 0.0939$ ,<br>$wR_2 = 0.2770$                                             |
| $R$ indices (all data)                                | $R_1 = 0.1400$ ,<br>$wR_2 = 0.3138$                                             |
| $\rho$ (e Å <sup>-3</sup> )                           | 0.56 and -0.29                                                                  |

**Table S3. Bond Distances (Å) and Angles (°) for SDU-9.**

|             |            |                                        |            |
|-------------|------------|----------------------------------------|------------|
| C1—O1       | 1.225 (13) | C9—C8                                  | 1.3900     |
| C1—O2       | 1.284 (12) | C9—H9                                  | 0.9300     |
| C1—C2       | 1.508 (16) | C8—C13                                 | 1.3900     |
| C2—C3       | 1.379 (17) | C8—H8                                  | 0.9300     |
| C2—C7       | 1.401 (15) | C13—Si                                 | 1.914 (7)  |
| C3—C4       | 1.454 (16) | Cu1—O2 <sup>i</sup>                    | 1.951 (6)  |
| C3—H3       | 0.9300     | Cu1—O2 <sup>ii</sup>                   | 1.951 (6)  |
| C4—C5       | 1.335 (14) | Cu1—O2 <sup>iii</sup>                  | 1.951 (6)  |
| C4—H4       | 0.9300     | Cu1—O2                                 | 1.951 (6)  |
| C5—C6       | 1.410 (15) | Cu1—O1W                                | 2.289 (13) |
| C5—C10      | 1.471 (12) | Cu1—Cu2                                | 2.615 (3)  |
| C6—C7       | 1.401 (17) | Cu2—O1 <sup>iii</sup>                  | 1.943 (8)  |
| C6—H6       | 0.9300     | Cu2—O1 <sup>ii</sup>                   | 1.943 (8)  |
| C7—H7       | 0.9300     | Cu2—O1 <sup>i</sup>                    | 1.943 (8)  |
| C12—C11—H11 | 120.0      | O1 <sup>ii</sup> —Cu2—Cu1              | 84.0 (2)   |
| C11—C10—C9  | 120.0      | O1 <sup>i</sup> —Cu2—Cu1               | 84.0 (2)   |
| C11—C10—C5  | 119.7 (8)  | O1—Cu2—Cu1                             | 84.0 (2)   |
| C9—C10—C5   | 120.1 (8)  | O2W—Cu2—Cu1                            | 180.0      |
| C10—C9—C8   | 120.0      | C1—O1—Cu2                              | 122.9 (7)  |
| C10—C9—H9   | 120.0      | C1—O2—Cu1                              | 120.0 (8)  |
| C8—C9—H9    | 120.0      | Si—O3—H3A                              | 109.5      |
| C13—C8—C9   | 120.0      | O3—Si—C13 <sup>iv</sup>                | 106.4 (8)  |
| C13—C8—H8   | 120.0      | O3—Si—C13                              | 106.4 (5)  |
| C9—C8—H8    | 120.0      | C13 <sup>iv</sup> —Si—C13              | 112.4 (7)  |
| C8—C13—C12  | 120.0      | O3—Si—C13 <sup>v</sup>                 | 106.4 (9)  |
| C8—C13—Si   | 120.3 (7)  | C13 <sup>iv</sup> —Si—C13 <sup>v</sup> | 112.4 (7)  |
| C12—C13—Si  | 118.4 (7)  | C13—Si—C13 <sup>v</sup>                | 112.4 (7)  |

Symmetry codes: (i)  $-x+2, y, -z$ ; (ii)  $-z+1, y, x-1$ ; (iii)  $z+1, y, -x+1$ ; (iv)  $-y+1, -z+1/2, x-1/2$ ; (v)  $z+1/2, -x+1, -y+1/2$

**Table S4. Bond Distances (Å) and Angles (°) for SDU-9.**

|             |            |                                         |            |
|-------------|------------|-----------------------------------------|------------|
| C12—C11     | 1.3900     | Cu2—O1                                  | 1.943 (8)  |
| C12—C13     | 1.3900     | Cu2—O2W                                 | 2.123 (13) |
| C12—H12     | 0.9300     | O3—Si                                   | 1.65 (3)   |
| C11—C10     | 1.3900     | O3—H3A                                  | 0.8200     |
| C11—H11     | 0.9300     | Si—C13 <sup>iv</sup>                    | 1.914 (10) |
| C10—C9      | 1.3900     | Si—C13 <sup>v</sup>                     | 1.914 (14) |
| O1—C1—O2    | 127.0 (11) | O2 <sup>i</sup> —Cu1—O2 <sup>ii</sup>   | 89.50 (4)  |
| O1—C1—C2    | 120.7 (10) | O2 <sup>i</sup> —Cu1—O2 <sup>iii</sup>  | 89.50 (4)  |
| O2—C1—C2    | 112.0 (11) | O2 <sup>ii</sup> —Cu1—O2 <sup>iii</sup> | 169.3 (4)  |
| C3—C2—C7    | 117.6 (11) | O2 <sup>i</sup> —Cu1—O2                 | 169.3 (4)  |
| C3—C2—C1    | 120.5 (11) | O2 <sup>ii</sup> —Cu1—O2                | 89.50 (4)  |
| C7—C2—C1    | 121.7 (11) | O2 <sup>iii</sup> —Cu1—O2               | 89.50 (4)  |
| C2—C3—C4    | 121.9 (11) | O2 <sup>i</sup> —Cu1—O1W                | 95.4 (2)   |
| C2—C3—H3    | 119.1      | O2 <sup>ii</sup> —Cu1—O1W               | 95.4 (2)   |
| C4—C3—H3    | 119.1      | O2 <sup>iii</sup> —Cu1—O1W              | 95.4 (2)   |
| C5—C4—C3    | 119.2 (12) | O2—Cu1—O1W                              | 95.4 (2)   |
| C5—C4—H4    | 120.4      | O2 <sup>i</sup> —Cu1—Cu2                | 84.6 (2)   |
| C3—C4—H4    | 120.4      | O2 <sup>ii</sup> —Cu1—Cu2               | 84.6 (2)   |
| C4—C5—C6    | 118.6 (11) | O2 <sup>iii</sup> —Cu1—Cu2              | 84.6 (2)   |
| C4—C5—C10   | 119.3 (11) | O2—Cu1—Cu2                              | 84.6 (2)   |
| C6—C5—C10   | 122.0 (10) | O1W—Cu1—Cu2                             | 180.0      |
| C7—C6—C5    | 122.6 (9)  | O1 <sup>iii</sup> —Cu2—O1 <sup>ii</sup> | 168.0 (5)  |
| C7—C6—H6    | 118.7      | O1 <sup>iii</sup> —Cu2—O1 <sup>i</sup>  | 89.37 (5)  |
| C5—C6—H6    | 118.7      | O1 <sup>ii</sup> —Cu2—O1 <sup>i</sup>   | 89.37 (5)  |
| C6—C7—C2    | 119.1 (11) | O1 <sup>iii</sup> —Cu2—O1               | 89.37 (5)  |
| C6—C7—H7    | 120.5      | O1 <sup>ii</sup> —Cu2—O1                | 89.37 (5)  |
| C2—C7—H7    | 120.5      | O1 <sup>i</sup> —Cu2—O1                 | 168.0 (5)  |
| C11—C12—C13 | 120.0      | O1 <sup>iii</sup> —Cu2—O2W              | 96.0 (2)   |
| C11—C12—H12 | 120.0      | O1 <sup>ii</sup> —Cu2—O2W               | 96.0 (2)   |
| C13—C12—H12 | 120.0      | O1 <sup>i</sup> —Cu2—O2W                | 96.0 (2)   |
| C10—C11—C12 | 120.0      | O1—Cu2—O2W                              | 96.0 (2)   |
| C10—C11—H11 | 120.0      | O1 <sup>iii</sup> —Cu2—Cu1              | 84.0 (2)   |

Symmetry codes: (i)  $-x+2, y, -z$ ; (ii)  $-z+1, y, x-1$ ; (iii)  $z+1, y, -x+1$ ; (iv)  $-y+1, -z+1/2, x-1/2$ ; (v)

$z+1/2, -x+1, -y+1/2$ .

Fig. S1: PXRD spectrum of SDU-9

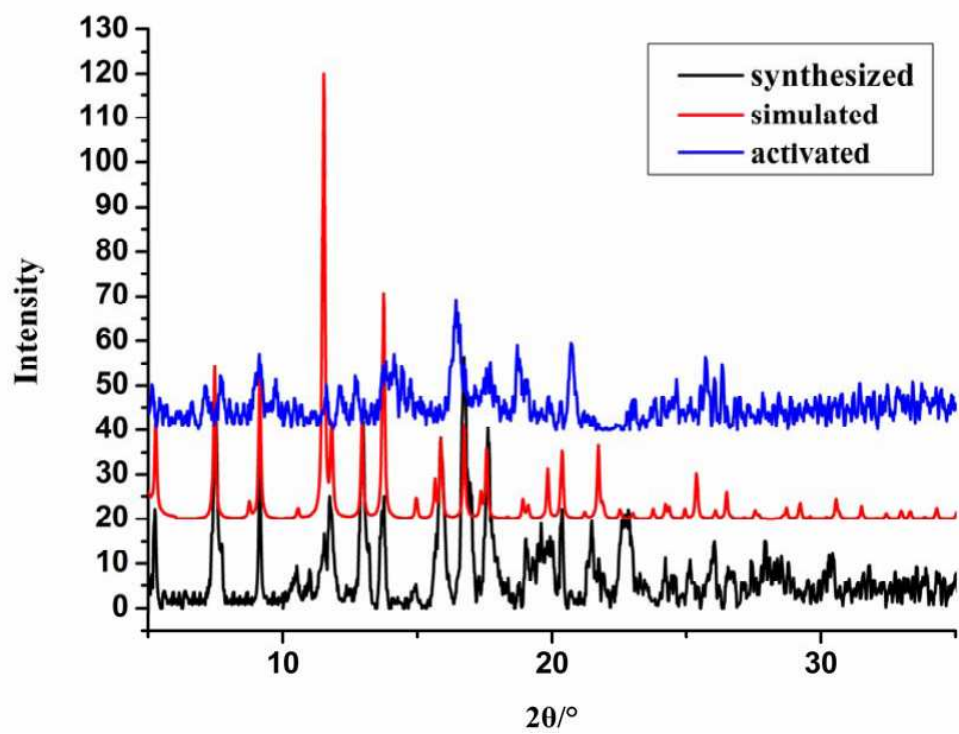

Fig. S2: IR spectrum of SDU-9

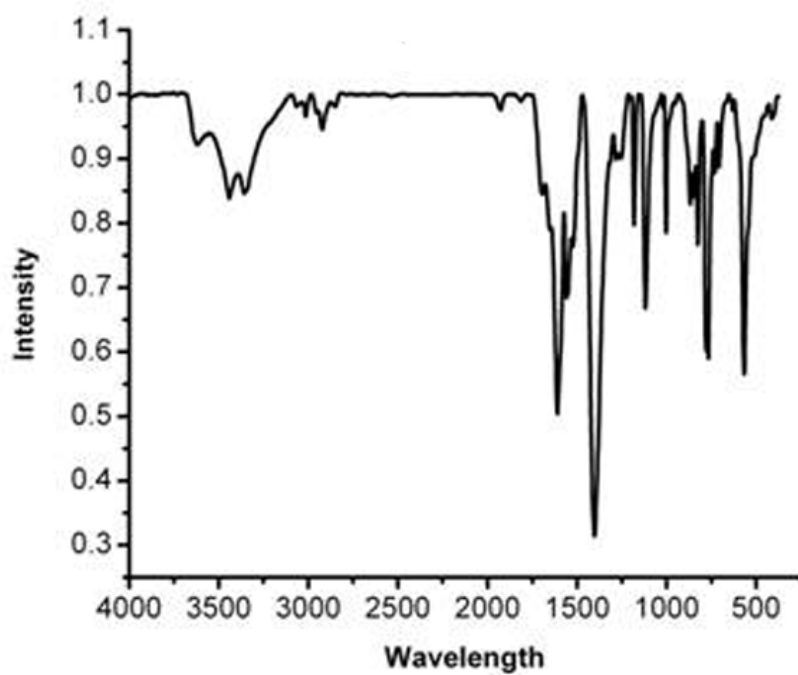

Fig. S3: TGA curve of SDU-9

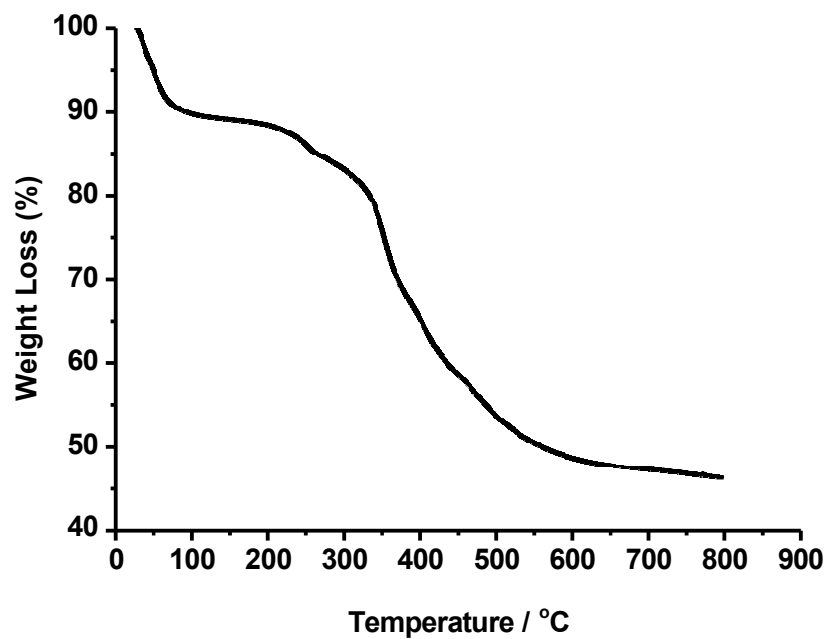



**Fig. S4: Conformations of four non-equivalent 12-rings in SDU-9.**

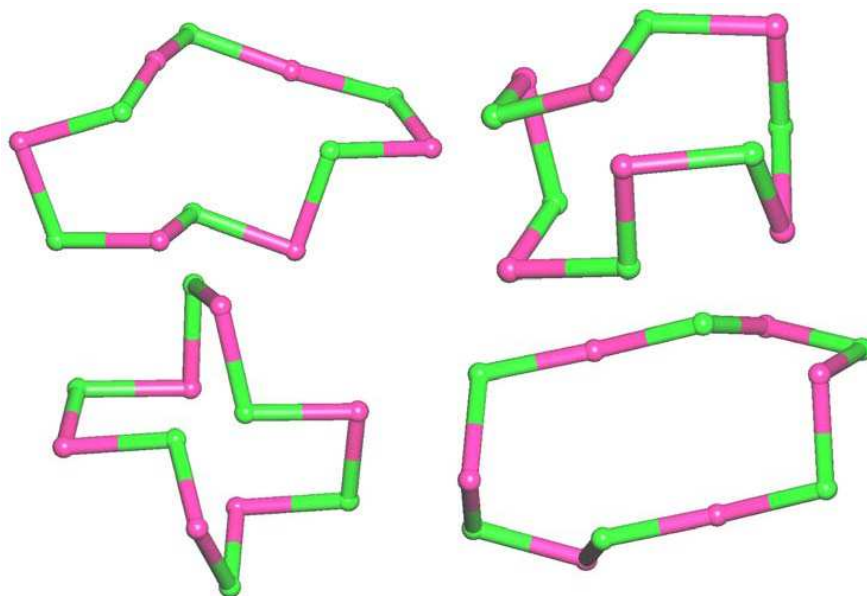

Supplement: Supplementary file 1 [file 4009189]
